# Supplementary material
Source: PubMed Central journal article supplement (PMC4751423)
Supplement: jcsm.12.2.161s1.pdf [file jcsm.12.2.161s1.pdf]

**Table S1. List of Features**

| Feature           | Feature Class | Coeff. Sign Constraint | Description                                             |
|-------------------|---------------|------------------------|---------------------------------------------------------|
| female            | Extractable   | None                   | =1 if female                                            |
| age_lt_30         | Extractable   | -                      | =1 if <30 years old                                     |
| age_geq_30        | Extractable   | +                      | =1 if ≥30 years old                                     |
| age_geq_45        | Extractable   | +                      | =1 if ≥45 years old                                     |
| age_geq_60        | Extractable   | +                      | =1 if ≥60 years old                                     |
| bmi_lt_25         | Extractable   | -                      | =1 if BMI <25                                           |
| bmi_geq_25        | Extractable   | +                      | =1 if BMI ≥25                                           |
| bmi_geq_30        | Extractable   | +                      | =1 if BMI ≥30                                           |
| bmi_geq_35        | Extractable   | +                      | =1 if BMI ≥35                                           |
| bmi_geq_40        | Extractable   | +                      | =1 if BMI ≥40                                           |
| CHF               | Extractable   | +                      | =1 if checks box for history of heart failure           |
| stroke            | Extractable   | +                      | =1 if checks box for history of stroke                  |
| pacemaker         | Extractable   | +                      | =1 if checks box for pacemaker                          |
| coronary disease  | Extractable   | +                      | =1 if checks box for history of coronary disease        |
| HTN               | Extractable   | +                      | =1 if checks box for history of hypertension            |
| diabetes          | Extractable   | +                      | =1 if checks box for history of diabetes                |
| smoking           | Extractable   | +                      | =1 if checks box for current smoker                     |
| sleepiness        | Symptoms      | +                      | =1 if checks box for sleepiness                         |
| snoring           | Symptoms      | +                      | =1 if checks box for snoring                            |
| stops breathing   | Symptoms      | +                      | =1 if checks box for stops breathing in sleep           |
| insomnia          | Symptoms      | +                      | =1 if checks box for insomnia                           |
| leg jerks         | Symptoms      | +                      | =1 if checks box for legs jerking during sleep          |
| latency_ge_60     | Symptoms      | None                   | =1 if checks box for sleep latency >60 minutes          |
| wakes_up_gt_3     | Symptoms      | None                   | =1 if checks box for waking up >3 times per night       |
| Falls back slowly | Symptoms      | None                   | =1 if checks box for difficulty falling back to sleep   |
| caffeine_geq_2    | Symptoms      | +                      | =1 if checks box for caffeine ≥ twice daily             |
| insomnia maint    | Symptoms      | +                      | =1 if checks box for difficulty maintaining sleep       |
| gasping arousals  | Symptoms      | +                      | =1 if checks box for gasping arousals from sleep        |
| dry mouth in AM   | Symptoms      | +                      | =1 if checks box for morning dry mouth                  |
| Tired regardless  | Symptoms      | +                      | =1 if checks box for tired regardless of sleep duration |
| ESS_geq_11        | Symptoms      | +                      | =1 if an ESS ≥11                                        |
| depression        | Symptoms      | None                   | =1 if checks box for depression                         |

BMI, body mass index; Coeff, coefficient; lt, less than; gt, greater than; geq, greater than or equal to; CHF, congestive heart failure; HTN, hypertension; latency refers to sleep onset (duration in minutes); wakes up refers to the self-reported number of awakenings per night; caffeine refers to the number of beverages per day; maint, maintenance insomnia; tired regardless refers to regardless of how much sleep has occurred; ESS, Epworth Sleepiness Scale

**Table S2. Performance of other learning algorithms**

| Method                    | Additional Constraints                                                   | AUC (Range)              |                          |                          |
|---------------------------|--------------------------------------------------------------------------|--------------------------|--------------------------|--------------------------|
|                           |                                                                          | All                      | Extractable              | Symptom                  |
| Lasso                     | -                                                                        | 0.797<br>(0.752 - 0.839) | 0.778<br>(0.735 - 0.812) | 0.696<br>(0.623 - 0.811) |
| Ridge                     | -                                                                        | 0.804<br>(0.749 - 0.862) | 0.785<br>(0.716 - 0.833) | 0.692<br>(0.614 - 0.814) |
| C5.0R                     | -                                                                        | 0.720<br>(0.649 - 0.784) | 0.697<br>(0.653 - 0.788) | 0.601<br>(0.562 - 0.655) |
| C5.0T                     | -                                                                        | 0.720<br>(0.643 - 0.783) | 0.698<br>(0.653 - 0.776) | 0.603<br>(0.564 - 0.659) |
| SVM Linear                | -                                                                        | 0.802<br>(0.751 - 0.866) | 0.777<br>(0.705 - 0.826) | 0.679<br>(0.599 - 0.796) |
| SVM RBF                   | -                                                                        | 0.766<br>(0.717 - 0.807) | 0.759<br>(0.706 - 0.816) | 0.652<br>(0.592 - 0.711) |
| Elastic Net               | -                                                                        | 0.793<br>(0.747 - 0.829) | 0.778<br>(0.727 - 0.813) | 0.693<br>(0.620 - 0.816) |
| Lasso<br>(Size 5 + Sign)  | Sign Constraints; Max 5 Features                                         | 0.733<br>(0.657 - 0.784) | 0.751<br>(0.699 - 0.806) | 0.682<br>(0.614 - 0.797) |
| Lasso<br>(Size 10 + Sign) | Sign Constraints; Max 10 Features                                        | 0.783<br>(0.736 - 0.821) | 0.776<br>(0.735 - 0.806) | 0.686<br>(0.618 - 0.813) |
| SLIM<br>(Size 5)          | Sign Constraints; Max 5 Features;<br>Integer Coeffs. between -10 and 10  | 0.772<br>(0.727 - 0.80)  | 0.770<br>(0.725 - 0.805) | 0.676<br>(0.622 - 0.780) |
| SLIM<br>(Size 10)         | Sign Constraints; Max 10 Features;<br>Integer Coeffs. between -20 and 20 | 0.785<br>(0.737 - 0.826) | 0.775<br>(0.722 - 0.819) | 0.670<br>(0.598 - 0.768) |

AUC, Area Under Receiver Operator Curve (top of each cell contains the mean of 10-CV is at top of each cell with the minimum and maximum of the 10-CV at the bottom); size refers to the number of features in the model; Coefs. coefficients; Max, maximum; Sign refers to the directionality of the relation between a factor and the presence of OSA. The full names for each method can be found in the methods. Note that sometimes the performance with Extractable Features does better than the performance with All Features (see e.g. Lasso Size 5), which may be a random variation.

**Table S3. Classifier performance details**

| <b>Model<br/>(FPR Goal 20%)</b> | <b>TPR<br/>(Range)</b> | <b>FPR<br/>(Range)</b> | <b>LR+</b> | <b>LR-</b> |
|---------------------------------|------------------------|------------------------|------------|------------|
| Extractable (size 10)           | 64.2%<br>(58.6 - 69.1) | 23.0%<br>(15.0 - 30.6) | 2.8        | 0.46       |
| Extractable (size 5)            | 61.6%<br>(54.9 - 68.8) | 20.8%<br>(12.5 - 30.4) | 3.0        | 0.48       |
| Symptoms (size 10)              | 46.7%<br>(39.1 - 59.6) | 25.7%<br>(10.0 - 41.7) | 1.8        | 0.71       |
| <b>Model<br/>(FPR Goal 40%)</b> | <b>TPR<br/>(Range)</b> | <b>FPR<br/>(Range)</b> | <b>LR+</b> | <b>LR-</b> |
| Extractable (size 10)           | 83.2%<br>(77.4 - 89.9) | 43.8%<br>(33.3 - 51.4) | 1.9        | 0.30       |
| Extractable (size 5)            | 82.8%<br>(77.4 - 88.1) | 42.1%<br>(33.3 - 52.5) | 2.0        | 0.30       |
| Symptoms (size 10)              | 69.0%<br>(63.8 - 77.6) | 45.7%<br>(32.6 - 58.3) | 1.5        | 0.57       |

TPR, true positive rate (10-CV mean on top; 10-CV min-max on bottom)

FPR, false positive rate (10-CV mean on top; 10-CV min-max on bottom)

LR+, positive likelihood ratio [sensitivity/(100-specificity)]

LR-, negative likelihood ratio [(100-sensitivity)/specificity]

Size refers to the number of features in the model
